# Supplementary material
Source: PubMed Central journal article supplement (PMC3124567)
Supplement: NIHMS292008-supplement-Supp_Fig_S1-S7.pdf [file NIHMS292008-supplement-Supp_Fig_S1-S7.pdf]

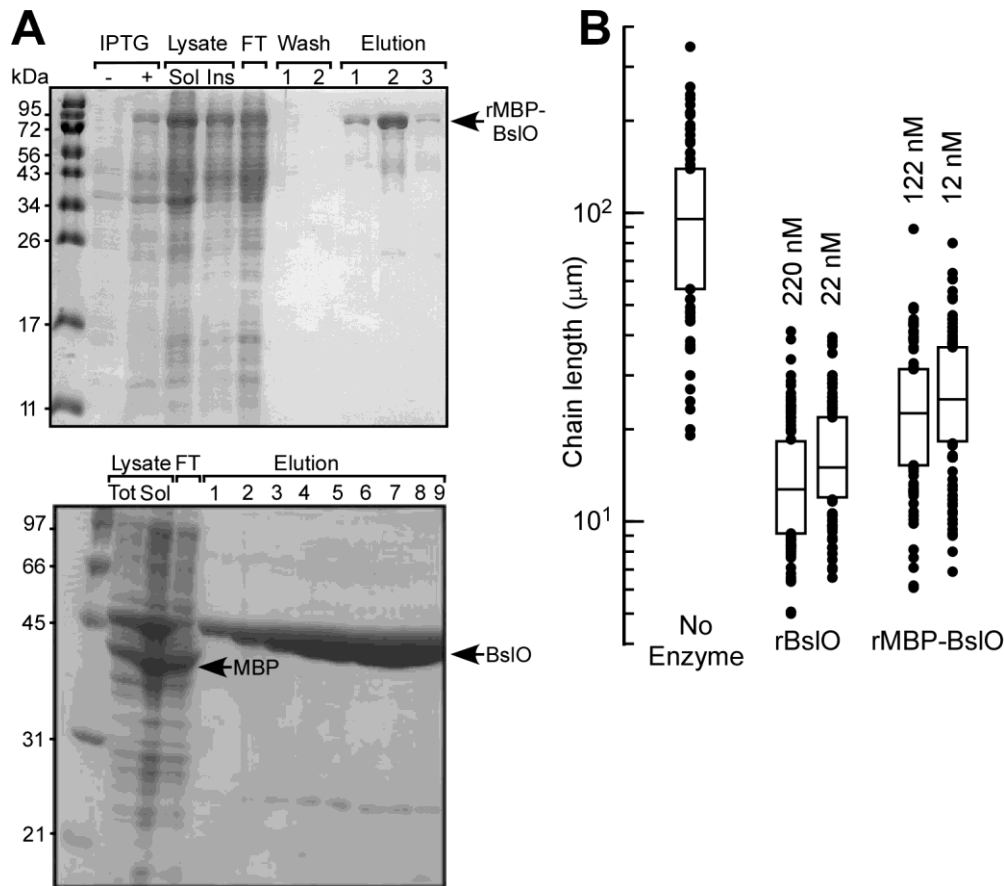

**Figure S1. Purification of MBP-BsIO and rBsIO from *Escherichia coli*.**

**A.** Upper panel, Coomassie blue-stained SDS-PAGE separating proteins extracted from *E. coli* BL21 (DE3, pMCSG-*bsIO*) grown in the absence (-) or in the presence of isopropyl- $\beta$ -thiogalactoside inducer (+IPTG). Lysates were centrifuged to separate soluble proteins in the supernatant (Sol) from insoluble proteins in the sediment (Insol). Cleared lysate was subjected to Ni-NTA affinity chromatography, collecting flow-through (FT), column wash (Wash) and eluate fractions (Elution).

Lower panel, Coomassie blue-stained SDS-PAGE separating proteins extracted from *E. coli* BL21 (DE3, pRK1037, pMCSG-*bsIO*) grown in presence of isopropyl- $\beta$ -thiogalactoside (+IPTG). Constitutive expression of TVMV protease from pRK1037 ensures cleavage of MBP-BsIO to generate rBsIO. rBsIO was purified via Ni-NTA affinity chromatography as described above for MBP-BsIO.

**B.** Box and whisker plot of *B. anthracis bsIO* mutant chain lengths without or with prior treatment with various concentrations of added rBsIO or MBP-BsIO. Box bounds 25<sup>th</sup> and 75<sup>th</sup> percentiles. Black bar denotes sample median and black circles represent first and fourth quartile. Data represents 1 of 2 independent biological replicates.

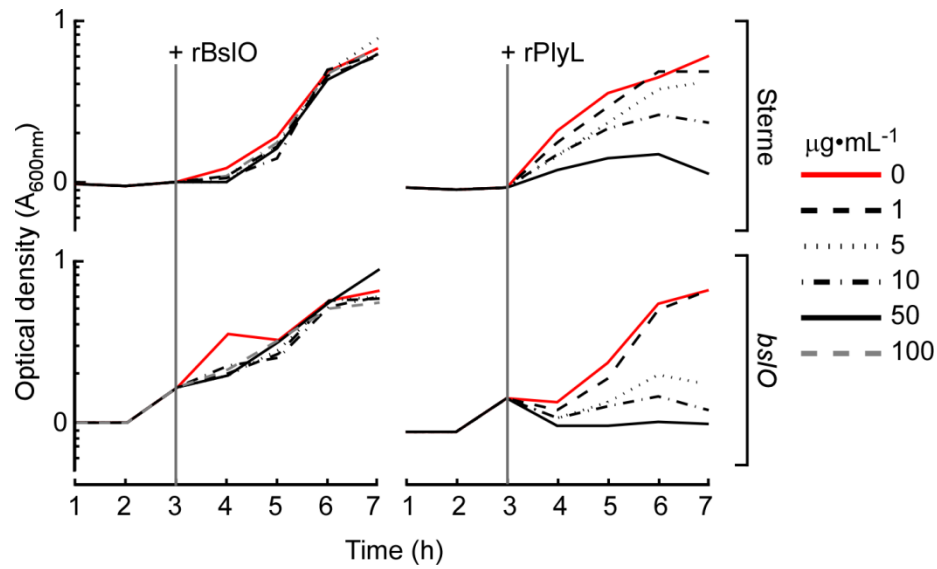

**Figure S2. Growth cultures of *B. anthracis* Sterne or its *bsI/O* mutant in the presence or absence peptidoglycan hydrolases.**

Growth or lysis of *B. anthracis* vegetative forms was measured as an increase or decrease in absorbance of bacterial cultures at 600 nm light over time, respectively. Time points of addition for purified PlyL or BsI/O are indicated. Legend denotes the concentration of added PlyL or rBsI/O.

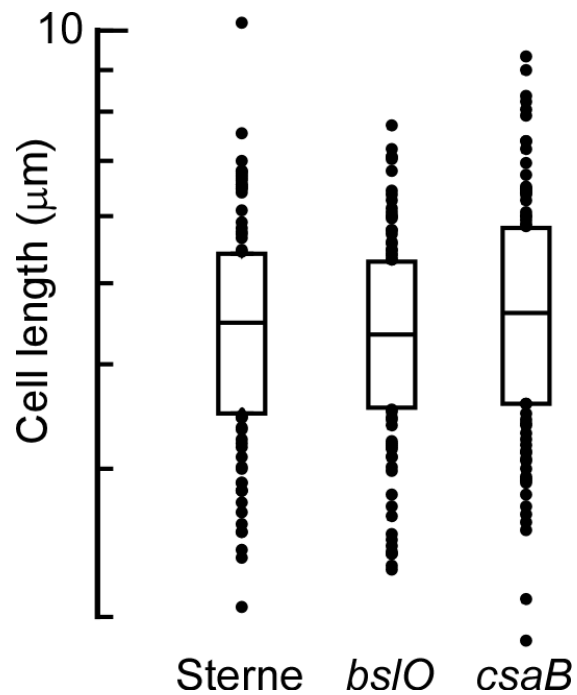

**Figure S3. Cell length of *B. anthracis* Sterne or its *csaB* and *bsI/O* variants.**

Bacilli were stained with the membrane dye FM4-64 and the distance of membranes adjacent to cell wall septa in *B. anthracis* chains were measured with fluorescence microscopy. Box and whisker plot of cell lengths where the box bounds 25<sup>th</sup> and 75<sup>th</sup> percentiles. Black bar denotes sample median and black circles represent first and fourth quartile. N=100 cells examined for each strain. Data represents 1 of 2 independent biological replicates.

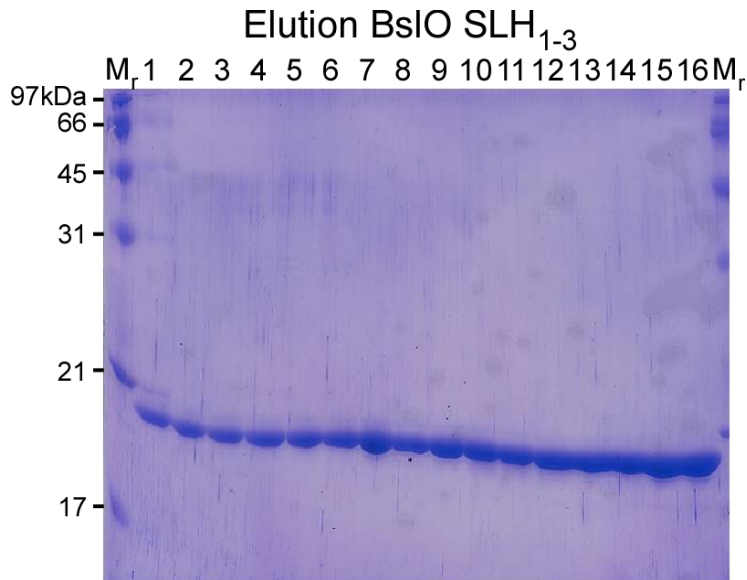

**Figure S4. Purification of BsIO-SLH<sub>1-3</sub> from *Escherichia coli*.**

Coomassie blue-stained SDS-PAGE separating BsIO-SLH<sub>1-3</sub> extracted and purified from *E. coli* BL21 (DE3, *pbsIO-SLH<sub>1-3</sub>*). Following rupture of *E. coli* cells in a French pressure cell at 14,000 psi, membranes and insoluble proteins were sedimented by centrifugation, solubilized in Buffer A (6 M guanidine-HCl, 10 mM Tris-HCl, 100 mM NaH<sub>2</sub>PO<sub>4</sub>, pH 8.0) and subjected to Ni-NTA affinity chromatography. The eluate was dialyzed against 50 mM Tris-HCl, 150 mM NaCl, 5% glycerol, subjected to a second round of Ni-NTA purification and collected fractions (1-16) separated on Coomassie-stained SDS-PAGE.

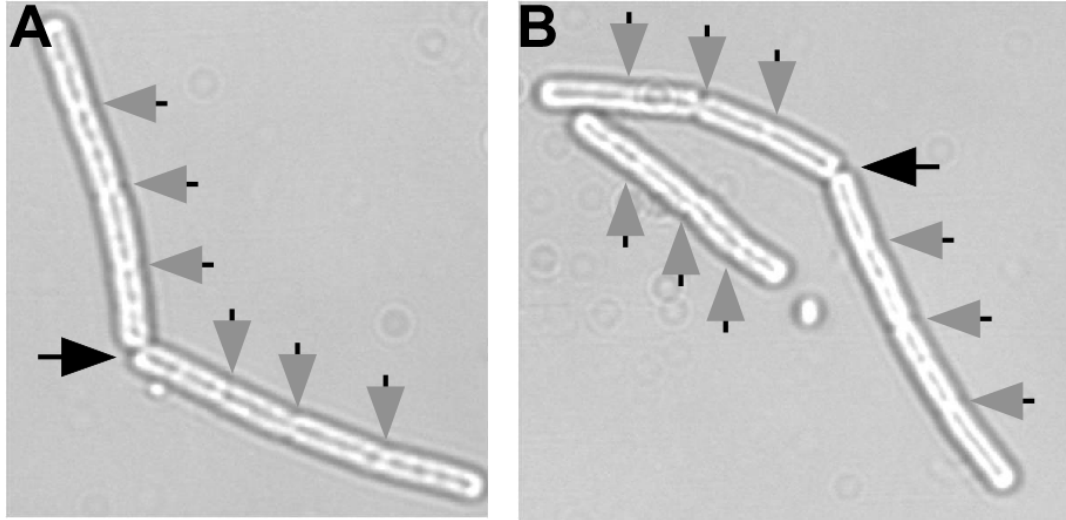

**Figure S5. Septal constrictions in chains of *B. anthracis* Sterne.**

**A, B.** DIC microscopy images of *B. anthracis* Sterne chains reveal varying degrees of constriction at cell wall septa connecting cells within each chain. Deeper invaginations (black arrowhead) occur at septa that are often spaced 4 cells apart, where intermittent septa (grey arrowheads) show either only small or no detectable constrictions.

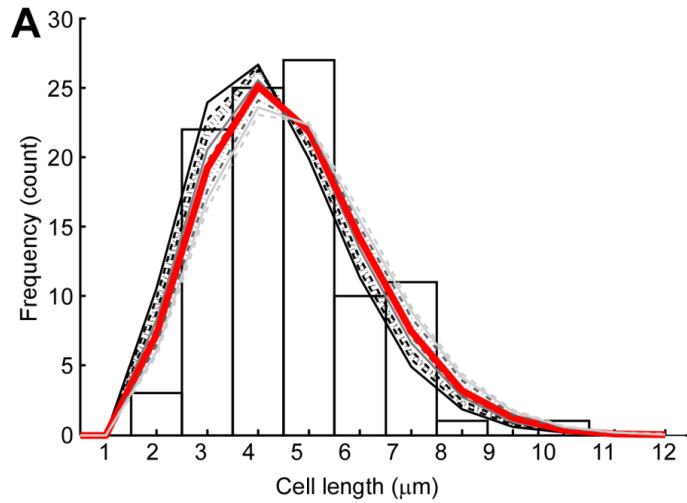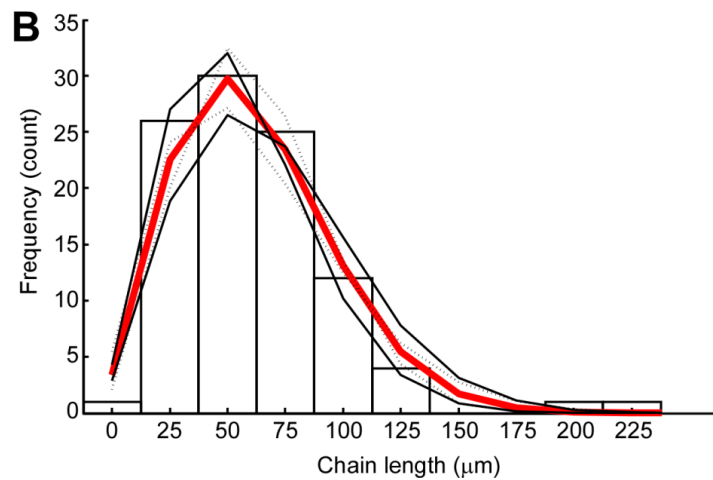

**Figure S6. Simulation of cell and chain lengths of *B. anthracis*.**

Upper panel, simulation of individual cell lengths within *B. anthracis* chains. Histogram (white boxes) represent distribution of experimentally determined individual cell length (N=100). Experimental data was used to estimate  $\lambda$ , the Poisson parameter. Red trace is the mean distribution of 1000 simulations, black and gray traces are the media of 1000 simulations where  $\lambda$  is varied within its 95% confidence interval.

Lower panel, simulation of *B. anthracis* chain lengths using simulated individual cell length data. Histogram (white boxes) represent the distribution of experimentally determined individual chain lengths (N=100). Experimental data were used to estimate the Weibull parameters,  $a$  and  $b$ . Red trace is the median distribution of 1000 simulations, black and gray traces bound the 95% confidence intervals of  $a$  and  $b$ .

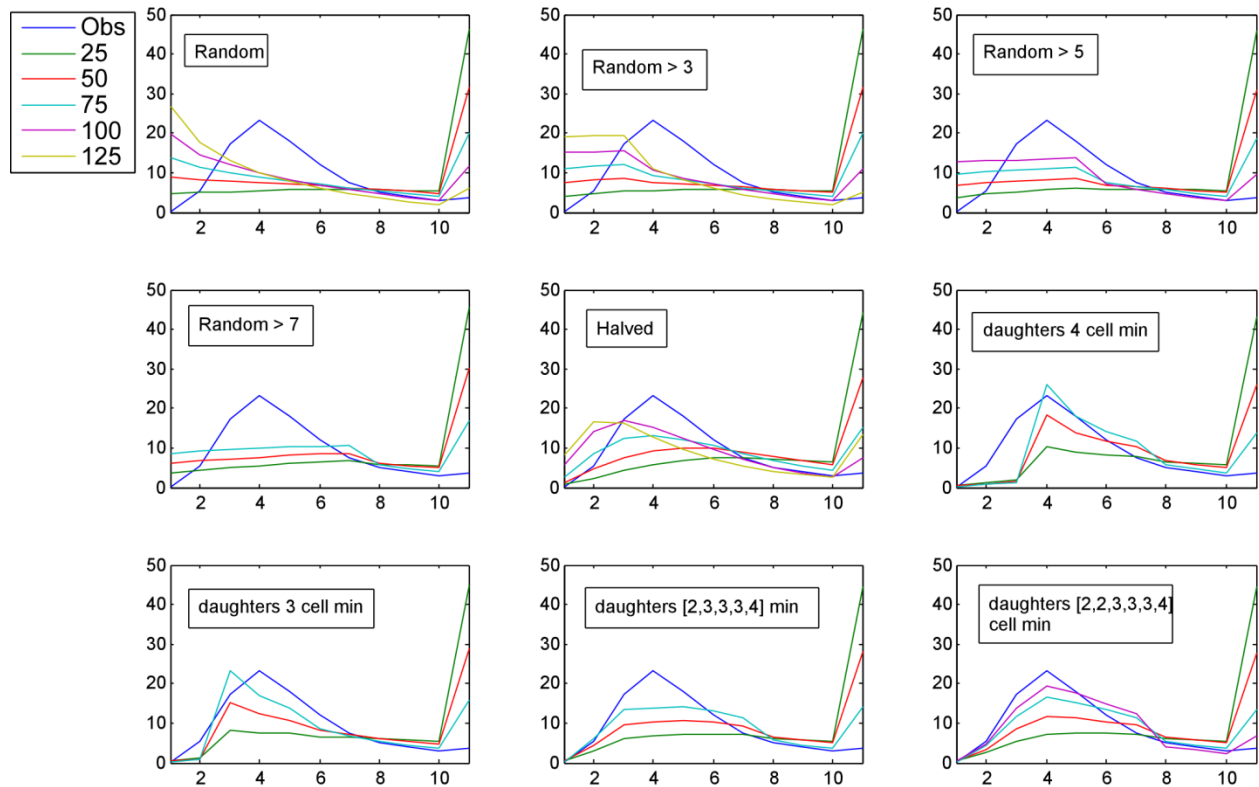

**Figure S7. Modeling *B. anthracis* chain separation.**

Legends identifies observed data (Obs) or the number of allowed septal cleavages in each simulation.

Rules impacting the cleavage of *B. anthracis* chains are listed in the insets to each simulation. See text for details.
